# Supplementary material for: Familial colorectal cancer risk in half siblings and siblings: nationwide cohort study
Source: PubMed Central journal article supplement — BMJ. 2019 Mar 14;364:l803. doi: 10.1136/bmj.l803 (PMC6417372; doi:10.1136/bmj.l803), 2019-03-14
Supplement: tiay047341.ww1.pdf [file tiay047341.ww1.pdf]

**Supplementary table A. Relative risk and absolute risk (cumulative risk) of familial colorectal cancer by various combinations of family history, sex, and age at diagnosis of youngest affected relative**

| Family history constellation | Relative risk by sex |                           |       |                           | Absolute risk by sex and age at diagnosis of youngest affected relative |                         |           |                         |           |                         |           |                         |
|------------------------------|----------------------|---------------------------|-------|---------------------------|-------------------------------------------------------------------------|-------------------------|-----------|-------------------------|-----------|-------------------------|-----------|-------------------------|
|                              | Men                  |                           | Women |                           | Men                                                                     |                         |           |                         | Women     |                         |           |                         |
|                              |                      |                           |       |                           | <50 years                                                               |                         | ≥50 years |                         | <50 years |                         | ≥50 years |                         |
|                              | N                    | SIR <sup>a</sup> (95% CI) | N     | SIR <sup>a</sup> (95% CI) | N                                                                       | LCR% (95% CI)           | N         | LCR% (95% CI)           | N         | LCR% (95% CI)           | N         | LCR (%) 95% CI          |
| <b>0 FDR + 0 SDR</b>         | 82748                | Reference                 | 74369 | Reference                 | -                                                                       |                         | -         |                         | -         |                         | -         |                         |
| <b>1 FDR + 0 SDR</b>         | 7094                 | <b>1.6</b> (1.6 to 1.7)   | 6385  | <b>1.6</b> (1.5 to 1.6)   | 591                                                                     | <b>8.4</b> (7.6 to 9.1) | 5693      | <b>7.1</b> (6.9 to 7.3) | 524       | <b>6.8</b> (6.2 to 7.4) | 4892      | <b>5.4</b> (5.2 to 5.5) |
| <b>2 FDRs + 0 SDR</b>        | 534                  | <b>2.6</b> (2.4 to 2.9)   | 435   | <b>2.3</b> (2.1 to 2.5)   | 121                                                                     | <b>15</b> (12 to 18)    | 383       | <b>10</b> (8.7 to 11)   | 78        | <b>8.6</b> (6.5 to 11)  | 318       | <b>7.5</b> (6.6 to 8.5) |
| <b>≥3 FDRs + 0 SDR</b>       | 67                   | <b>5.6</b> (4.4 to 7.2)   | 45    | <b>4.0</b> (2.9 to 5.4)   | 22                                                                      | <b>24</b> (13 to 34)    | 44        | <b>19</b> (13 to 24)    | 17        | <b>16</b> (7.6 to 23)   | 27        | <b>14</b> (8.2 to 19)   |
| <b>0 FDR + 1 SDR</b>         | 770                  | <b>1.2</b> (1.1 to 1.2)   | 807   | <b>1.2</b> (1.2 to 1.3)   | 227                                                                     | <b>4.5</b> (3.9 to 5.1) | 460       | <b>6.8</b> (5.7 to 7.9) | 257       | <b>4.1</b> (3.6 to 4.6) | 443       | <b>4.6</b> (3.8 to 5.4) |
| <b>1 FDR + 1 SDR</b>         | 168                  | <b>2.4</b> (2.1 to 2.8)   | 150   | <b>2.2</b> (1.9 to 2.6)   | 83                                                                      | <b>10</b> (7.7 to 13)   | 68        | <b>7.6</b> (4.5 to 11)  | 71        | <b>7.9</b> (5.9 to 10)  | 70        | <b>5.8</b> (3.6 to 7.8) |
| <b>2 FDRs + 1 SDR</b>        | 26                   | <b>4.5</b> (2.9 to 6.6)   | 24    | <b>4.7</b> (3.0 to 7.0)   | 19                                                                      | <b>16</b> (7.3 to 23)   | 6         | <b>10</b> (1.7 to 18)   | 17        | <b>15</b> (6.8 to 22)   | 5         | 11 (0 to 21)            |
| <b>≥3 FDRs + 1 SDR</b>       | 6                    | <b>9.9</b> (3.6 to 22)    | 7     | <b>12</b> (4.9 to 25)     | 5                                                                       | <b>25</b> (3.4 to 41)   | 1         | 13 (0 to 34)            | 3         | 19 (0 to 36)            | 3         | 32 (0 to 58)            |
| <b>0 FDR + 2 SDRs</b>        | 50                   | <b>1.5</b> (1.1 to 2.0)   | 57    | <b>1.8</b> (1.3 to 2.3)   | 8                                                                       | 4.0 (0 to 8.4)          | 40        | <b>39</b> (0.6 to 63)   | 2         | 0.3 (0 to 0.6)          | 54        | 5.3 (0 to 12)           |
| <b>1 FDR + 2 SDRs</b>        | 20                   | <b>5.7</b> (3.5 to 8.7)   | 16    | <b>5.1</b> (2.9 to 8.3)   | 12                                                                      | <b>12</b> (2.4 to 20)   | 8         | <b>1.4</b> (0.3 to 2)   | 8         | 7.2 (0 to 16)           | 8         | 21 (0 to 45)            |
| <b>2 FDRs + 2 SDRs</b>       | 4                    | <b>14</b> (3.7 to 35)     | 2     | 4.3 (0.5 to 16)           | 4                                                                       | 19 (0 to 34)            | 0         | -                       | 2         | 8.1 (0 to 18)           | 0         | -                       |
| <b>≥3 FDRs + 2 SDRs</b>      | 0                    | -                         | 0     | -                         | 0                                                                       | -                       | 0         | -                       | 0         | -                       | 0         | -                       |
| <b>0 FDR + ≥3 SDRs</b>       | 6                    | 2.1 (0.8 to 4.6)          | 2     | 0.8 (0.1 to 2.8)          | 2                                                                       | 40 (0 to 77)            | 4         | 7.4 (0 to 16)           | 1         | 0.6 (0 to 1.7)          | 1         | 0.1 (0 to 0.4)          |
| <b>1 FDR + ≥3 SDRs</b>       | 2                    | 4.7 (0.6 to 17)           | 0     | -                         | 2                                                                       | 5.5 (0 to 13)           | 0         | -                       | 0         | -                       | 0         | -                       |
| <b>2 FDRs + ≥3 SDRs</b>      | 2                    | <b>21</b> (2.5 to 76)     | 0     | -                         | 0                                                                       | -                       | 2         | 78 (0 to 98)            | 0         | -                       | 0         | -                       |
| <b>≥3 FDRs + ≥3 SDRs</b>     | 0                    | -                         | 0     | -                         | 0                                                                       | -                       | 0         | -                       | 0         | -                       | 0         | -                       |

N: Number of cases; SIR: Standardized incidence ratio; CI: Confidence interval; LCR: Lifetime (0-79 years) cumulative risk; FDR: First-degree relative; SDR: Second-degree relative

<sup>a</sup> Adjusted for age, calendar periods, residential areas and socioeconomic status

Significant risks are indicated in bold.

**Supplementary table B. Relative risk and absolute risk (cumulative risk) of familial colorectal cancer by detailed relationship, sex, and age at diagnosis of youngest affected relative**

| Relationship                        | Relative risk by sex |                           |       |                           | Absolute risk by sex and age at diagnosis of youngest affected relative |                         |      |                         |       |                         |      |                         |
|-------------------------------------|----------------------|---------------------------|-------|---------------------------|-------------------------------------------------------------------------|-------------------------|------|-------------------------|-------|-------------------------|------|-------------------------|
|                                     | Men                  |                           | Women |                           | Men                                                                     |                         |      |                         | Women |                         |      |                         |
|                                     | N                    | SIR <sup>a</sup> (95% CI) | N     | SIR <sup>a</sup> (95% CI) | <50                                                                     | ≥50                     | <50  | ≥50                     | <50   | ≥50                     | <50  | ≥50                     |
| <b>1 Sibling + 0 SDR</b>            | 1164                 | <b>1.7</b> (1.6 to 1.8)   | 925   | <b>1.6</b> (1.5 to 1.7)   | 106                                                                     | <b>10</b> (6.7 to 14)   | 1039 | <b>7.9</b> (7.3 to 8.5) | 79    | <b>6.3</b> (4.4 to 8.2) | 825  | <b>5.9</b> (5.4 to 6.4) |
| <b>1 Brother</b>                    | 656                  | <b>1.8</b> (1.6 to 1.9)   | 509   | <b>1.7</b> (1.5 to 1.8)   | 53                                                                      | <b>12</b> (5.8 to 17)   | 595  | <b>8.0</b> (7.2 to 8.8) | 41    | <b>8.0</b> (4.5 to 11)  | 457  | <b>6.0</b> (5.3 to 6.7) |
| <b>1 Sister</b>                     | 508                  | <b>1.6</b> (1.5 to 1.8)   | 416   | <b>1.5</b> (1.4 to 1.7)   | 53                                                                      | <b>9.3</b> (4.6 to 14)  | 444  | <b>7.8</b> (6.9 to 8.7) | 38    | <b>5.1</b> (3.1 to 7.1) | 368  | <b>5.8</b> (5.1 to 6.5) |
| <b>1 Half-Sibling + 0 FDR</b>       | 71                   | <b>1.5</b> (1.1 to 1.8)   | 69    | <b>1.6</b> (1.3 to 2.1)   | 9                                                                       | 4.3 (0 to 8.8)          | 59   | <b>7.7</b> (4.9 to 10)  | 14    | <b>6.7</b> (0.2 to 13)  | 54   | <b>4.8</b> (3.2 to 6.4) |
| <b>1 Maternal half-sibling</b>      | 29                   | 1.2 (0.8 to 1.8)          | 31    | <b>1.6</b> (1.1 to 2.3)   | 4                                                                       | <b>2.0</b> (0.0 to 4.0) | 23   | <b>6.1</b> (2.4 to 9.7) | 4     | 2.7 (0 to 5.4)          | 26   | <b>5.6</b> (2.7 to 8.5) |
| <b>1 Paternal half-sibling</b>      | 42                   | <b>1.7</b> (1.2 to 2.3)   | 38    | <b>1.7</b> (1.2 to 2.3)   | 5                                                                       | 7.9 (0 to 19)           | 36   | <b>9.1</b> (5.1 to 13)  | 10    | 8.5 (0 to 17)           | 28   | <b>4.0</b> (2.4 to 5.7) |
| <b>1 Parent + 0 SDR</b>             | 3052                 | <b>1.6</b> (1.5 to 1.7)   | 2468  | <b>1.6</b> (1.5 to 1.6)   | 104                                                                     | <b>17</b> (4.1 to 28)   | 2917 | <b>7.3</b> (6.9 to 7.7) | 88    | <b>7.9</b> (2.9 to 13)  | 2348 | <b>5.7</b> (5.4 to 6.0) |
| <b>Father</b>                       | 1470                 | <b>1.6</b> (1.5 to 1.7)   | 1227  | <b>1.6</b> (1.5 to 1.7)   | 48                                                                      | 40 (0 to 69)            | 1407 | <b>7.0</b> (6.5 to 7.5) | 46    | <b>5.7</b> (3.2 to 8.1) | 1167 | <b>5.9</b> (5.4 to 6.3) |
| <b>Mother</b>                       | 1582                 | <b>1.6</b> (1.5 to 1.7)   | 1241  | <b>1.5</b> (1.4 to 1.6)   | 56                                                                      | <b>9.7</b> (5.0 to 14)  | 1510 | <b>7.6</b> (7.1 to 8.2) | 42    | <b>8.2</b> (1.9 to 14)  | 1181 | <b>5.5</b> (5.1 to 6.0) |
| <b>1 Grandparent + 0 FDR</b>        | 231                  | <b>1.2</b> (1.0 to 1.3)   | 229   | <b>1.2</b> (1.0 to 1.3)   | 6                                                                       | <b>0.3</b> (0.0 to 0.5) | 225  | <b>1.3</b> (0.8 to 1.9) | 7     | 5.9 (0 to 16)           | 222  | <b>1.9</b> (0.1 to 3.7) |
| <b>1 Uncle/Aunt + 0 FDR</b>         | 90                   | 1.1 (0.9 to 1.4)          | 99    | <b>1.2</b> (1.0 to 1.5)   | 5                                                                       | 0.3 (0 to 0.5)          | 85   | <b>1.4</b> (0.7 to 2.1) | 7     | 1.0 (0 to 2.6)          | 92   | 2.6 (0 to 6.1)          |
| <b>1 Half-sibling + 1 FDR</b>       | 23                   | <b>3.7</b> (2.4 to 5.6)   | 18    | <b>3.3</b> (2.0 to 5.2)   | 11                                                                      | <b>13</b> (4.7 to 21)   | 11   | <b>14</b> (2.4 to 25)   | 5     | 15 (0 to 29)            | 12   | <b>6.3</b> (2.4 to 10)  |
| <b>1 Maternal half-sib. + 1 FDR</b> | 8                    | <b>2.8</b> (1.2 to 5.6)   | 7     | <b>2.6</b> (1.0 to 5.3)   | 2                                                                       | 6.1 (0 to 14)           | 6    | <b>12</b> (0.5 to 22)   | 1     | 2.7 (0 to 7.9)          | 6    | <b>7.2</b> (1.0 to 13)  |
| <b>1 Paternal half-sib. + 1 FDR</b> | 15                   | <b>4.4</b> (2.5 to 7.3)   | 11    | <b>4.0</b> (2.0 to 7.2)   | 9                                                                       | <b>19</b> (5.0 to 31)   | 5    | 14 (0 to 29)            | 4     | 20 (0 to 38)            | 6    | <b>5.3</b> (0.6 to 9.7) |
| <b>1 Half-sibling + 1 Sibling</b>   | 4                    | 3.0 (0.8 to 7.8)          | 4     | <b>3.7</b> (1.0 to 9.6)   | 0                                                                       | -                       | 3    | 29 (0 to 55)            | 0     | -                       | 3    | 11 (0 to 22)            |
| <b>1 Half-sibling + 1 Parent</b>    | 19                   | <b>3.9</b> (2.4 to 6.2)   | 13    | <b>3.1</b> (1.7 to 5.3)   | 11                                                                      | <b>18</b> (6.0 to 29)   | 8    | <b>7.1</b> (0.9 to 13)  | 4     | 11 (0 to 21)            | 9    | <b>4.8</b> (1.4 to 8.1) |
| <b>1 Grandparent + 1 FDR</b>        | 39                   | <b>2.8</b> (2.0 to 3.8)   | 43    | <b>3.2</b> (2.3 to 4.4)   | 8                                                                       | <b>1.1</b> (0.3 to 1.9) | 31   | <b>1.6</b> (0.8 to 2.5) | 11    | 11 (0 to 23)            | 32   | <b>2.2</b> (0.8 to 3.5) |
| <b>1 Uncle/Aunt + 1 FDR</b>         | 16                   | <b>2.5</b> (1.4 to 4.0)   | 12    | 1.9 (1.0 to 3.3)          | 5                                                                       | <b>1.3</b> (0.1 to 2.6) | 11   | <b>1.7</b> (0.3 to 3.1) | 6     | <b>3.4</b> (0.3 to 6.3) | 6    | <b>0.4</b> (0.1 to 0.8) |
| <b>2 Half-siblings + 0 FDR</b>      | 4                    | <b>4.8</b> (1.3 to 12)    | 2     | 2.2 (0.3 to 8.1)          | 1                                                                       | 12 (0 to 31)            | 3    | 25 (0 to 48)            | 0     | -                       | 2    | 7.2 (0 to 17)           |
| <b>2 Siblings + 0 SDR</b>           | 60                   | <b>2.3</b> (1.8 to 3.0)   | 45    | <b>2.2</b> (1.6 to 2.9)   | 9                                                                       | <b>8.3</b> (2.5 to 14)  | 51   | <b>10</b> (6.9 to 14)   | 2     | 1.8 (0 to 4.2)          | 42   | <b>9.2</b> (5.7 to 12)  |
| <b>1 Sibling + 1 Parent + 0 SDR</b> | 220                  | <b>2.8</b> (2.4 to 3.2)   | 176   | <b>2.6</b> (2.2 to 3.0)   | 47                                                                      | <b>14</b> (8.6 to 20)   | 171  | <b>9.4</b> (7.7 to 11)  | 31    | <b>16</b> (5.0 to 26)   | 143  | <b>8.1</b> (6.4 to 9.7) |

N: Number of cases; SIR: Standardized incidence ratio; CI: Confidence interval; LCR: Lifetime (0-79 years) cumulative risk; FDR: First-degree relative; SDR: Second-degree relative; Half-sib.:

Half-sibling; <sup>a</sup> Adjusted for age, calendar periods, residential areas and socioeconomic status; maximum age in the third generation of the latest available dataset was 68 years, so cumulative risk for grandparents/aunts/uncle are limited to this age. Significant risks are indicated in bold.

**Supplementary table C. Relative risk and absolute risk (cumulative risk) of familial colorectal cancer by various combinations of family history excluding half-siblings**

| Family history constellation                  | Relative risk by sex |                           |       |                           | Absolute risk by sex and age at diagnosis of youngest affected relative |                         |     |                         |     |                         |     |                         |
|-----------------------------------------------|----------------------|---------------------------|-------|---------------------------|-------------------------------------------------------------------------|-------------------------|-----|-------------------------|-----|-------------------------|-----|-------------------------|
|                                               | Men                  |                           | Women |                           | Men                                                                     |                         |     | Women                   |     |                         |     |                         |
|                                               |                      |                           |       |                           | <50                                                                     | ≥50                     |     | <50                     | ≥50 |                         |     |                         |
|                                               | N                    | SIR <sup>a</sup> (95% CI) | N     | SIR <sup>a</sup> (95% CI) | N                                                                       | LCR% (95% CI)           | N   | LCR% (95% CI)           | N   | LCR% (95% CI)           | N   | LCR% (95% CI)           |
| <b>0 FDR + 1 SDR (excl. half-sibling)</b>     | 699                  | <b>1.1</b> (1.1 to 1.2)   | 738   | <b>1.2</b> (1.1 to 1.3)   | 218                                                                     | <b>4.4</b> (3.8 to 5.1) | 401 | <b>6.5</b> (5.3 to 7.8) | 243 | <b>4.0</b> (3.5 to 4.5) | 389 | <b>4.3</b> (3.4 to 5.2) |
| <b>1 FDR + 1 SDR (excl. half-sibling)</b>     | 145                  | <b>2.3</b> (1.9 to 2.7)   | 132   | <b>2.1</b> (1.8 to 2.5)   | 72                                                                      | <b>9.7</b> (7.2 to 12)  | 57  | <b>6.1</b> (3.2 to 8.9) | 66  | <b>7.7</b> (5.7 to 9.6) | 58  | <b>5.5</b> (3.1 to 7.7) |
| <b>2 FDRs + 1 SDR (excl. half-sibling)</b>    | 25                   | <b>4.7</b> (3.0 to 7.0)   | 23    | <b>4.9</b> (3.1 to 7.4)   | 19                                                                      | <b>16</b> (7.8 to 24)   | 5   | <b>12</b> (1.1 to 21)   | 17  | <b>15</b> (7.0 to 22)   | 4   | 9.2 (0 to 20)           |
| <b>≥3 FDRs + 1 SDR (excl. half-sibling)</b>   | 6                    | <b>10</b> (3.8 to 22)     | 6     | <b>10</b> (3.8 to 23)     | 5                                                                       | <b>25</b> (3.4 to 41)   | 1   | 13 (0 to 34)            | 2   | 13 (0 to 29)            | 3   | 32 (0 to 58)            |
| <b>0 FDR + 2 SDRs (excl. half-siblings)</b>   | 45                   | <b>1.4</b> (1.0 to 1.9)   | 54    | <b>1.8</b> (1.3 to 2.3)   | 6                                                                       | 3.3 (0 to 7.6)          | 37  | 45 (0 to 76)            | 2   | 0.3 (0 to 0.7)          | 51  | <b>1.8</b> (0.7 to 2.9) |
| <b>1 FDR + 2 SDRs (excl. half-siblings)</b>   | 18                   | <b>5.3</b> (3.2 to 8.5)   | 14    | <b>4.7</b> (2.6 to 8.0)   | 10                                                                      | <b>11</b> (1.3 to 20)   | 8   | <b>1.4</b> (0.3 to 2.5) | 7   | 7.4 (0 to 17)           | 7   | 8.7 (0 to 19)           |
| <b>2 FDRs + 2 SDRs (excl. half-siblings)</b>  | 3                    | <b>10</b> (2.2 to 31)     | 2     | 4.3 (0.5 to 16)           | 3                                                                       | 15 (0 to 30)            | 0   | -                       | 2   | 8.5 (0 to 19)           | 0   | -                       |
| <b>≥3 FDRs + 2 SDRs (excl. half-siblings)</b> | 0                    | -                         | 0     | -                         | 0                                                                       | -                       | 0   | -                       | 0   | -                       | 0   | -                       |

N: Number of cases; SIR: Standardized incidence ratio; CI: Confidence interval; LCR: Lifetime (0-79 years) cumulative risk; FDR: First-degree relative; SDR: Second-degree relative

<sup>a</sup> Adjusted for sex, age, calendar periods, residential areas and socioeconomic status

Significant risks are indicated in bold.

**Supplementary table D. Relative risk of familial colorectal cancer by calendar periods of diagnosis**

| Family history constellation | <1970 |                         | ≥1970  |                         | <1980 |                         | ≥1980  |                         | <1990 |                         | ≥1990  |                         | <2000 |                         | ≥2000 |                         | <2005  |                         | ≥2005 |                         |
|------------------------------|-------|-------------------------|--------|-------------------------|-------|-------------------------|--------|-------------------------|-------|-------------------------|--------|-------------------------|-------|-------------------------|-------|-------------------------|--------|-------------------------|-------|-------------------------|
|                              | N     | SIR (95%CI)             | N      | SIR (95%CI)             | N     | SIR (95%CI)             | N      | SIR (95%CI)             | N     | SIR (95%CI)             | N      | SIR (95%CI)             | N     | SIR (95%CI)             | N     | SIR (95%CI)             | N      | SIR (95%CI)             | N     | SIR (95%CI)             |
| <b>0 FDR + 0 SDR</b>         | 8095  | Reference               | 149022 | Reference               | 23517 | Reference               | 133600 | Reference               | 49634 | Reference               | 107483 | Reference               | 84973 | Reference               | 72144 | Reference               | 105086 | Reference               | 52031 | Reference               |
| <b>1 FDR + 0 SDR</b>         | 681   | <b>1.7</b> (1.6 to 1.9) | 12798  | <b>1.6</b> (1.6 to 1.6) | 1845  | <b>1.6</b> (1.6 to 1.7) | 11634  | <b>1.6</b> (1.6 to 1.6) | 3721  | <b>1.6</b> (1.6 to 1.7) | 9758   | <b>1.6</b> (1.6 to 1.6) | 6220  | <b>1.6</b> (1.6 to 1.6) | 7259  | <b>1.6</b> (1.6 to 1.6) | 7919   | <b>1.6</b> (1.6 to 1.7) | 5560  | <b>1.6</b> (1.5 to 1.6) |
| <b>2 FDRs + 0 SDR</b>        | 33    | <b>2.5</b> (1.7 to 3.5) | 936    | <b>2.5</b> (2.3 to 2.6) | 94    | <b>2.4</b> (1.9 to 2.9) | 875    | <b>2.5</b> (2.3 to 2.7) | 184   | <b>2.2</b> (1.9 to 2.6) | 785    | <b>2.5</b> (2.4 to 2.7) | 381   | <b>2.5</b> (2.3 to 2.8) | 588   | <b>2.4</b> (2.2 to 2.6) | 512    | <b>2.6</b> (2.3 to 2.8) | 457   | <b>2.4</b> (2.2 to 2.6) |
| <b>≥3 FDRs + 0 SDR</b>       | 2     | 3.1 (0.4 to 11)         | 110    | <b>4.9</b> (4.0 to 5.9) | 8     | <b>4.0</b> (1.7 to 8.0) | 104    | <b>4.9</b> (4.0 to 6.0) | 18    | <b>4.2</b> (2.5 to 6.7) | 94     | <b>5.0</b> (4.0 to 6.1) | 49    | <b>6.1</b> (4.5 to 8.0) | 63    | <b>4.2</b> (3.2 to 5.4) | 56     | <b>5.0</b> (3.8 to 6.5) | 56    | <b>4.7</b> (3.6 to 6.1) |
| <b>0 FDR + 1 SDR</b>         | 83    | <b>1.5</b> (1.2 to 1.9) | 1494   | <b>1.2</b> (1.1 to 1.2) | 230   | <b>1.5</b> (1.3 to 1.7) | 1347   | <b>1.2</b> (1.1 to 1.2) | 405   | <b>1.3</b> (1.1 to 1.4) | 1172   | <b>1.2</b> (1.1 to 1.2) | 665   | <b>1.2</b> (1.1 to 1.3) | 912   | <b>1.2</b> (1.1 to 1.3) | 839    | <b>1.2</b> (1.1 to 1.3) | 738   | <b>1.2</b> (1.1 to 1.2) |
| <b>1 FDR + 1 SDR</b>         | 18    | <b>3.0</b> (1.8 to 4.8) | 300    | <b>2.3</b> (2.0 to 2.6) | 41    | <b>2.4</b> (1.7 to 3.3) | 277    | <b>2.3</b> (2.0 to 2.6) | 66    | <b>1.9</b> (1.5 to 2.5) | 252    | <b>2.5</b> (2.2 to 2.8) | 111   | <b>2.0</b> (1.6 to 2.4) | 207   | <b>2.6</b> (2.2 to 2.9) | 148    | <b>2.1</b> (1.8 to 2.4) | 170   | <b>2.6</b> (2.2 to 3.0) |
| <b>2 FDRs + 1 SDR</b>        | 5     | <b>12</b> (3.8 to 27)   | 45     | <b>4.3</b> (3.1 to 5.8) | 7     | <b>5.3</b> (2.1 to 11)  | 43     | <b>4.5</b> (3.3 to 6.1) | 19    | <b>6.5</b> (3.9 to 10)  | 31     | <b>3.9</b> (2.6 to 5.5) | 28    | <b>5.8</b> (3.9 to 8.4) | 22    | <b>3.6</b> (2.3 to 5.5) | 33     | <b>5.4</b> (3.7 to 7.6) | 17    | <b>3.5</b> (2.1 to 5.7) |
| <b>≥3 FDRs + 1 SDR</b>       | 1     | 16 (0.4 to 87)          | 12     | <b>11</b> (5.5 to 19)   | 4     | <b>32</b> (8.6 to 81)   | 9      | <b>8.5</b> (3.9 to 16)  | 5     | <b>22</b> (7.0 to 50)   | 8      | <b>8.4</b> (3.6 to 17)  | 12    | <b>28</b> (14 to 48)    | 1     | 1.3 (0.0 to 7.4)        | 12     | <b>20</b> (11 to 36)    | 1     | 1.7 (0.0 to 9.3)        |
| <b>0 FDR + 2 SDRs</b>        | 3     | 4.7 (1.0 to 14)         | 104    | <b>1.6</b> (1.3 to 2.0) | 3     | 1.3 (0.3 to 3.9)        | 104    | <b>1.7</b> (1.4 to 2.0) | 9     | 1.4 (0.6 to 2.7)        | 98     | <b>1.7</b> (1.4 to 2.0) | 16    | 1.1 (0.7 to 1.8)        | 91    | <b>1.8</b> (1.4 to 2.2) | 28     | 1.3 (0.9 to 1.9)        | 79    | <b>1.8</b> (1.4 to 2.2) |
| <b>1 FDR + 2 SDRs</b>        | 1     | 12 (0.3 to 64)          | 35     | <b>5.3</b> (3.7 to 7.4) | 1     | 3.4 (0.1 to 19)         | 35     | <b>5.5</b> (3.8 to 7.6) | 2     | 2.5 (0.3 to 8.9)        | 34     | <b>5.8</b> (4.0 to 8.1) | 6     | <b>3.5</b> (1.3 to 7.6) | 30    | <b>6.1</b> (4.1 to 8.7) | 12     | <b>4.9</b> (2.5 to 8.6) | 24    | <b>5.7</b> (3.6 to 8.5) |
| <b>2 FDRs + 2 SDRs</b>       | 0     | -                       | 6      | <b>8.2</b> (3.0 to 18)  | 2     | <b>22</b> (2.6 to 78)   | 4      | <b>6.0</b> (1.6 to 15)  | 2     | <b>9.9</b> (1.2 to 36)  | 4      | <b>7.2</b> (2.0 to 18)  | 3     | <b>8.2</b> (1.7 to 24)  | 3     | <b>7.6</b> (1.6 to 22)  | 5      | <b>11</b> (3.6 to 26)   | 1     | 3.2 (0.1 to 18)         |
| <b>≥3 FDRs + 2 SDRs</b>      | 0     | -                       | 0      | -                       | 0     | -                       | 0      | -                       | 0     | -                       | 0      | -                       | 0     | -                       | 0     | -                       | 0      | -                       | 0     | -                       |
| <b>0 FDR + ≥3 SDRs</b>       | 0     | -                       | 8      | 1.5 (0.6 to 2.9)        | 0     | -                       | 8      | 1.5 (0.7 to 3.0)        | 0     | -                       | 8      | 1.6 (0.7 to 3.1)        | 0     | -                       | 8     | 1.8 (0.8 to 3.6)        | 2      | 1.3 (0.2 to 4.6)        | 6     | 1.6 (0.6 to 3.4)        |
| <b>1 FDR + ≥3 SDRs</b>       | 0     | -                       | 2      | 2.4 (0.3 to 8.7)        | 0     | -                       | 2      | 2.5 (0.3 to 9.0)        | 0     | -                       | 2      | 2.8 (0.3 to 10)         | 0     | -                       | 2     | 3.4 (0.4 to 12)         | 0      | -                       | 2     | 4.0 (0.5 to 14)         |
| <b>2 FDRs + ≥3 SDRs</b>      | 0     | -                       | 2      | <b>21</b> (2.6 to 77)   | 0     | -                       | 2      | <b>23</b> (2.8 to 84)   | 0     | -                       | 2      | <b>30</b> (3.6 to 107)  | 0     | -                       | 2     | <b>59</b> (7.2 to 214)  | 0      | -                       | 2     | <b>137</b> (17 to 495)  |
| <b>≥3 FDRs + ≥3 SDRs</b>     | 0     | -                       | 0      | -                       | 0     | -                       | 0      | -                       | 0     | -                       | 0      | -                       | 0     | -                       | 0     | -                       | 0      | -                       | 0     | -                       |

N: Number of cases; SIR: Standardized incidence ratio; CI: Confidence interval; LCR: Lifetime (0-79 years) cumulative risk; FDR: First-degree relative; SDR: Second-degree relative

All SIRs were adjusted for sex, age, calendar periods, residential areas and socioeconomic status

Significant risks are indicated in bold.
